# Supplementary material for: Microfluidic gradient device for simultaneously preparing four distinct types of microparticles
Source: Royal Society of Chemistry journal article supplement (doi:10.1039/c9ra02330e), 2019-01-01
Supplement: c9ra02330e1.pdf [file c9ra02330e1.pdf]

## Supporting Information

### Microfluidic gradient device for simultaneously preparing four distinct types of microparticles

Yuanyue Liu<sup>1,2,3,\*</sup>

<sup>1</sup> National Engineering Research Center for Tissue Restoration and Reconstruction, South China University of Technology, Guangzhou 510006, P. R. China

<sup>2</sup> Key Laboratory of Biomedical Materials and Engineering of the Ministry of Education, South China University of Technology, Guangzhou 510006, P. R. China

<sup>3</sup> School of Materials Science and Engineering, South China University of Technology, Guangzhou 510641, P. R. China

\* Corresponding author now at: No. 381, Wushan Road, Tianhe District, Guangzhou 510641, P. R. China.

E-mail address: [17875232221@163.com](mailto:17875232221@163.com)

**Table 1** Analogy between electronics and microfluidics

| Electronics                                          | Microfluidics                                                                       |
|------------------------------------------------------|-------------------------------------------------------------------------------------|
| Electric current $I$ /Amp                            | Volumetric flow rate $Q$ /m <sup>3</sup> s <sup>-1</sup>                            |
| Voltage drop $\Delta V$ /Volt                        | Pressure drop $\Delta p$ /Pa                                                        |
| Electric resistance $R_E/\Omega$ : $R_E \propto L/A$ | Hydraulic resistance $R_H$ /Pa s <sup>3</sup> m <sup>-1</sup> : $R_H \propto L/A^2$ |
| Ohm's law: $V = IR_E$                                | Hagen-Poiseuille's law: $\Delta p = QR_H$                                           |

The designed microfluidics device is composed of 11 channel segments ( $L_1, L_2 \dots L_{11}$ ), 4 meshes (M1, M2, M3, M4), 5 nodes (N1, N2, N3, N4, N5). The

flow rates of channel segments are  $Q_1, Q_2 \dots Q_{11}$ .

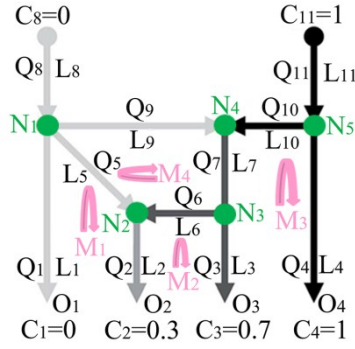

Fig. S1 schematic of gradient generator

According to the diffusive mixing equation,<sup>1</sup> the 3/7 ratio of  $Q_9$  and  $Q_{10}$  can obtain. As the same way, the 4/3 ratio of  $Q_5$  and  $Q_6$  can obtain. Let  $L_6=L_8=L_{10}=L_{11}=a$ ,  $L_9=b$ ,  $L_2=L_7=c$ , and  $Q_1=Q_2=Q_3=Q_4=Q$ . Kirchhoff's current law (KCL) indicates that the algebraic sum of the currents entering any node is zero:  $I_1 + I_2 + \dots + I_N=0$ , similarly  $\sum Q_n=0$ .

$$\text{Node 1 (N1): } Q_1+Q_5-Q_8+Q_9=0$$

$$\text{Node 2 (N2): } Q_2-Q_5-Q_6=0$$

$$\text{Node 3 (N3): } Q_3+Q_6-Q_7=0$$

$$\text{Node 4 (N4): } Q_7-Q_9-Q_{10}=0$$

$$\text{Node 5 (N5): } Q_4+Q_{10}-Q_{11}=0$$

$$Q_8+Q_{11}=4Q_1$$

The volumetric flow rate of the gradient module channel can be obtained by solving the above equations.  $Q_5=4/7Q$ ,  $Q_6=3/7Q$ ,  $Q_7=10/7Q$ ,  $Q_8=2Q$ ,  $Q_9=3/7Q$ ,  $Q_{10}=Q$ , and  $Q_{11}=2Q$ .

Kirchhoff's voltage law (KVL) indicates that the algebraic sum of the voltages around any closed path is zero:  $V_1+V_2+\dots+V_N=0$ , similarly  $\sum P_n=0$ .

Meshe 1 (M1):  $Q_1L_1 - Q_2L_2 - Q_5L_5 = 0$

Meshe 2 (M2):  $Q_3L_3 + Q_7L_7 + Q_{10}L_{10} - Q_4L_4 = 0$

Meshe 3 (M3):  $Q_2L_2 + Q_6L_6 - Q_3L_3 = 0$

Meshe 4 (M4):  $Q_6L_6 + Q_7L_7 + Q_9L_9 - Q_5L_5 = 0$

The channel length of the gradient generator can be calculated by solving the above equations.  $L_1 = 3/7a + 1/3b + 17/7c$ ,  $L_3 = 3/7a + b$ , and  $L_5 = 3/4a + 3/4b + 5/2c$ . Let  $L_6 = L_8 = L_{10} = L_{11} = a = 7$  mm,  $L_9 = b = 14$  mm, and  $L_2 = L_7 = c = 21$  mm. Then, the length of the gradient generator can be obtained.

**Table 2** Productivity of the microfluidic gradient device

|                                    | OL-1  | OL-2  | OL-3  | OL-4  |
|------------------------------------|-------|-------|-------|-------|
| Average diameter ( $\mu\text{m}$ ) | 156.3 | 153.2 | 155.2 | 158.2 |
| Productivity ( $10^5$ /h)          | 1.25  | 1.33  | 1.28  | 1.2   |

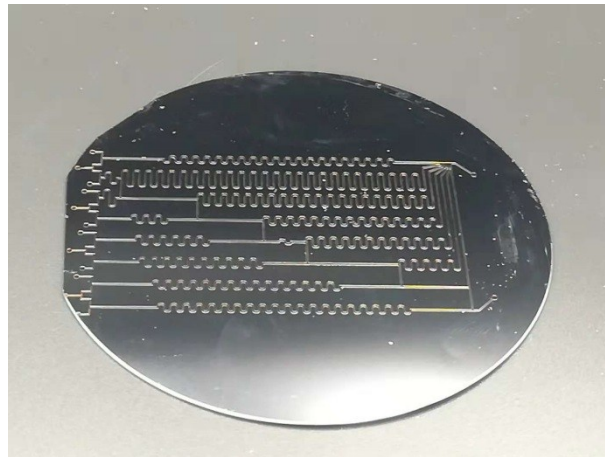

Fig. S2 Photo of silicon wafer with eight outlets microchannel

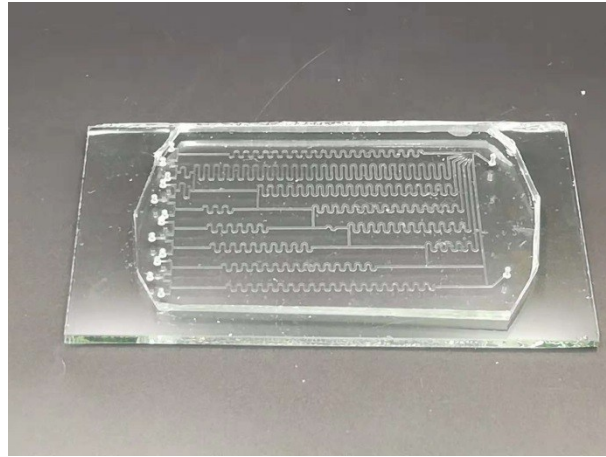

Fig. S3 The image of microfluidics gradient chip with eight outlets

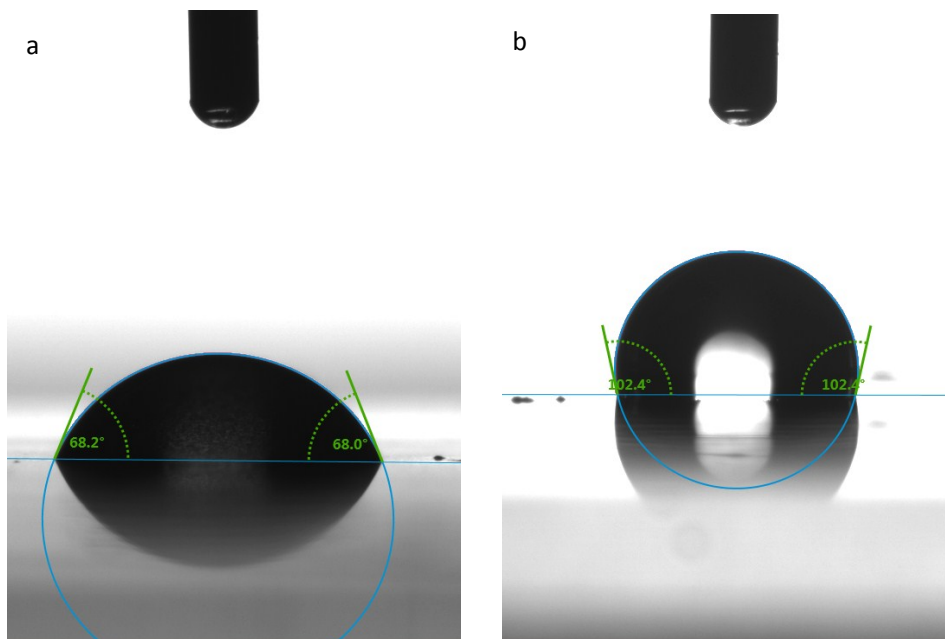

Fig. S4 Water contact angles measure (a) PLGA/DMC; (b) PCL/DMC

## References

- 1 K. W. Oh, K. Lee, B. Ahn and E. P. Furlani, *Lab Chip*, 2012, **12**, 515-545.
